# Supplementary material for: Immunopathogenesis of Nipah Virus Infection and Associated Immune Responses
Source: MDPI journal article supplement (doi:10.3390/immuno3020011), 2023-04-27
Supplement: s1 [file s1]

## Supplementary Materials

**Table S1.** NiV proteins (adapted from source: Uniprot, accessed on March 8, 2023).

| Protein Names                                    | Gene Names | Length (Amino Acids) |
|--------------------------------------------------|------------|----------------------|
| RNA-directed RNA polymerase L (Protein L)        | L          | 2244                 |
| Non-structural protein V                         | P/V/C      | 456                  |
| Glycoprotein G                                   | G          | 602                  |
| Fusion glycoprotein F0 (Protein F)               | F          | 546                  |
| Matrix protein (Protein M)                       | M          | 352                  |
| Phosphoprotein (Protein P)                       | P/V/C      | 709                  |
| Nucleoprotein (Protein N) (Nucleocapsid protein) | N          | 532                  |
| Protein W                                        | P/V/C      | 450                  |

**Table S2.** HeV Proteins (adapted from source: Uniprot, accessed on March 13, 2023).

| Protein Names                                    | Gene Names | Length (Amino Acids) |
|--------------------------------------------------|------------|----------------------|
| Fusion glycoprotein F0 (Protein F)               | F          | 546                  |
| RNA-directed RNA polymerase L (Protein L)        | L          | 2244                 |
| Non-structural protein V                         | P/V/C      | 457                  |
| Phosphoprotein (Protein P)                       | P/V/C      | 707                  |
| Nucleoprotein (Protein N) (Nucleocapsid protein) | N          | 532                  |
| Matrix protein (Protein M)                       | M          | 352                  |
| Glycoprotein G                                   | G          | 604                  |
| Protein C                                        | P/V/C      | 166                  |
| Protein W                                        | P/V/C      | 448                  |

**Table S3.** Current Clinical Trials (Source: [www.clinicaltrials.gov](http://www.clinicaltrials.gov), accessed on March 10, 2023).

| NCT ID      | Title                                                                    | Locations    |
|-------------|--------------------------------------------------------------------------|--------------|
| NCT04199169 | Safety and immunogenicity of a Nipah virus vaccine                       | OH, USA      |
| NCT05178901 | Phase 1: evaluate safety and immunogenicity PHV02                        | KS, USA      |
| NCT05398796 | Dose-escalation evaluation of the safety and immunogenicity of mRNA-1215 | NIH, MD, USA |
| NCT01811784 | Community intervention to prevent Nipah spillover                        | Bangladesh   |
