# Supplementary material for: Immunopathogenesis of Nipah Virus Infection and Associated Immune Responses
Source: MDPI journal article supplement (doi:10.3390/immuno3020011), 2023-04-27
Supplement: s1 [file s1]

Archive with 4 entries (4 files):
- Figure S1.jpg
- Figure S2.jpg
- Figure S3.jpg
- Table 123.pdf
