# Supplementary figures and images for: Immunopathogenesis of Nipah Virus Infection and Associated Immune Responses
Source: MDPI journal article supplement (doi:10.3390/immuno3020011), 2023-04-27

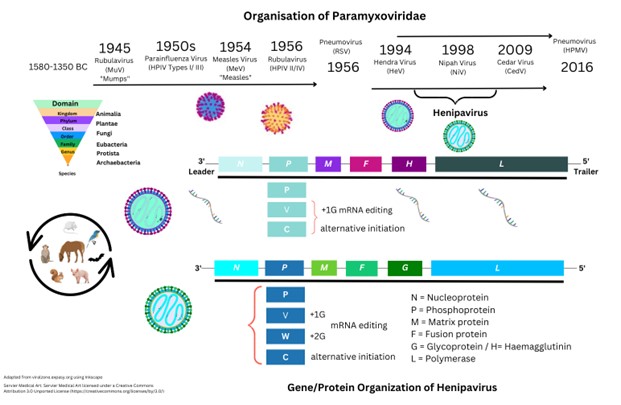

Supplement: s1 [file s1 › Figure S1.jpg]

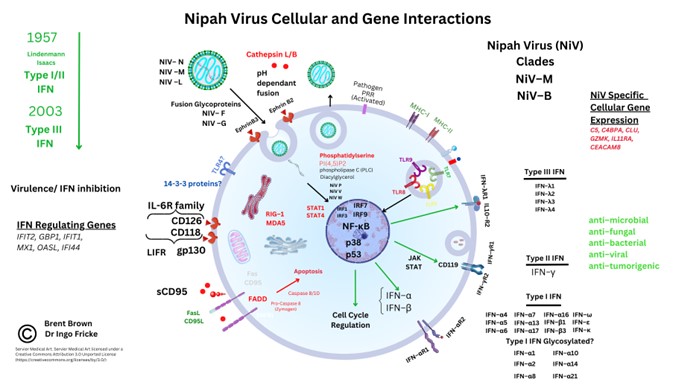

Supplement: s1 [file s1 › Figure S2.jpg]

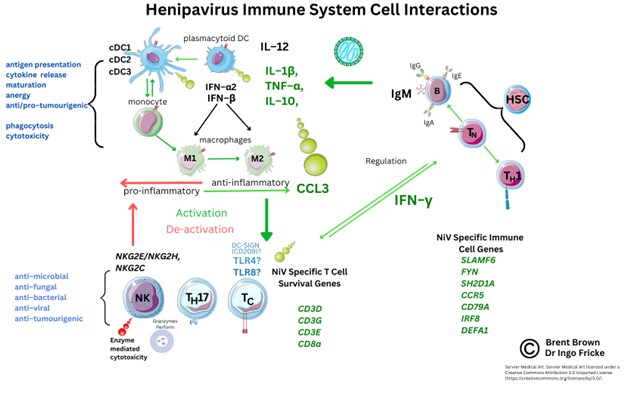

Supplement: s1 [file s1 › Figure S3.jpg]
